# Supplementary material for: Exploring Synergy in Combinations of Tumor-Derived Vaccines That Harbor 4-1BBL, OX40L, and GM-CSF
Source: PubMed Central journal article supplement (PMC5610681; doi:10.3389/fimmu.2017.01150), 2017-09-19

*Supplementary Material*

*Exploring synergy in combinations of tumor-derived vaccines that harbor 4-1BBL,  
OX40L, and GM-CSF*

**Andrea J. Manrique-Rincón, Camila M. Beraldo, Jéssica M. Toscaro, Marcio C. Bajgelman\***

**\*Correspondence:**

Marcio C. Bajgelman

[marcio.bajgelman@lnbio.cnpem.br](mailto:marcio.bajgelman@lnbio.cnpem.br)

FIGURE S1

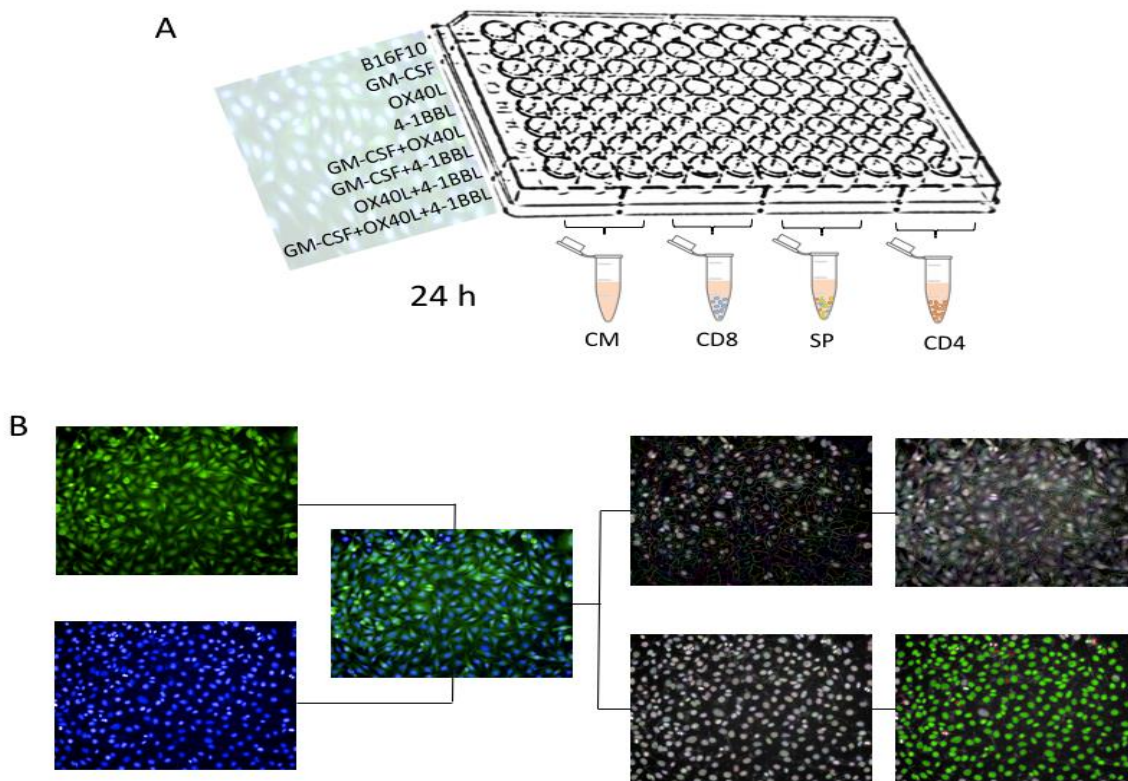

**Figure S1. High-content *in vitro* imaging assay used to evaluate effects of tumor cells expressing immunomodulators.** Schematic representation of *in vitro* assay (A) tumor modified cells were plated in D10 medium. Twenty-four hours later, when cells were adherent, the D10 medium of tumor cells was changed for complete medium, containing pre-activated CD8, CD4 or freshly isolated splenocytes. Then they were co-cultivated and analyzed using high-content imaging. Analysis of high-content imaging using Operetta system (B). First each well is divided in 27 fields, then each field is acquired for GFP and DAPI, this generates an image that is analyzed based on parameters like roundness for nucleus and fluorescence intensity for GFP to determine the number of live cells in each well.

**FIGURE S2**

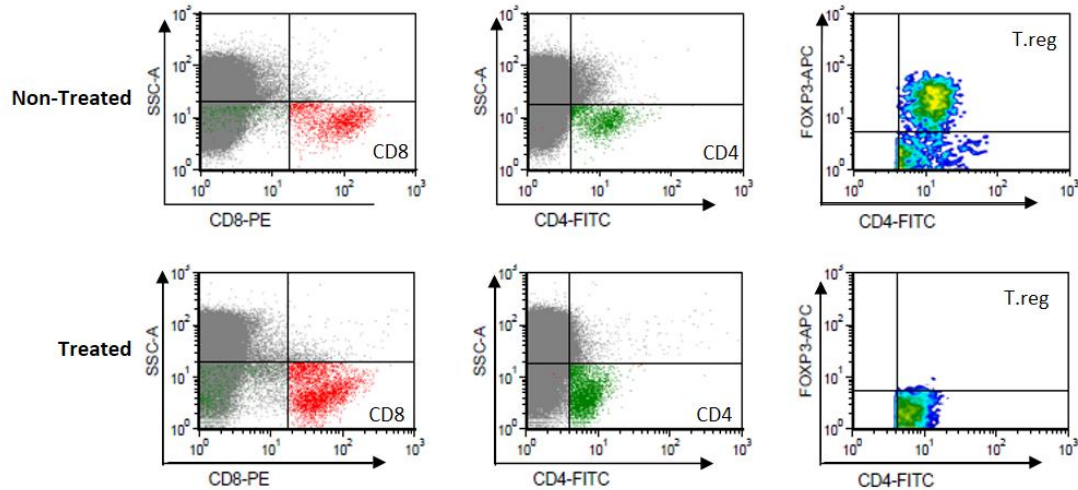

**Figure S2. Flow cytometry of tumor infiltrating lymphocytes.** Representative dot plots of tumor-infiltrating lymphocytes in non-treated mice (1X PBS) and mice treated with vaccines ((This image is representative of all conditions challenged with double and triple combinations since no significant differences was observed among these groups)). Non treated mice had a small ratio of CD8 (+)Teff /Treg compared to treated mice (Figure 5C). Single-cell suspensions were prepared from tumors at day 28 and stained for CD8, CD4 then cells were fixed, permeabilized and stained for FOXP3.

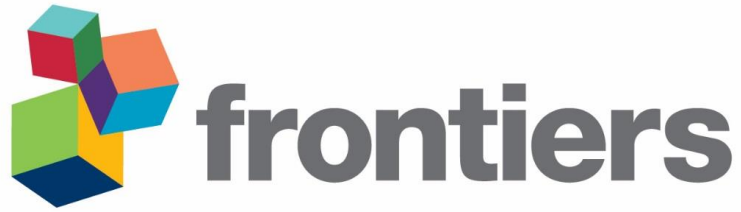

Supplement: image_1.pdf [file image_1.pdf]
